# Supplementary material
Source: PubMed Central journal article supplement (PMC3557036)
Supplement: 1212100110_pnas.201212100SI.pdf [file 1212100110_pnas.201212100SI.pdf]

# Supporting Information

Wegmann et al. 10.1073/pnas.1212100110

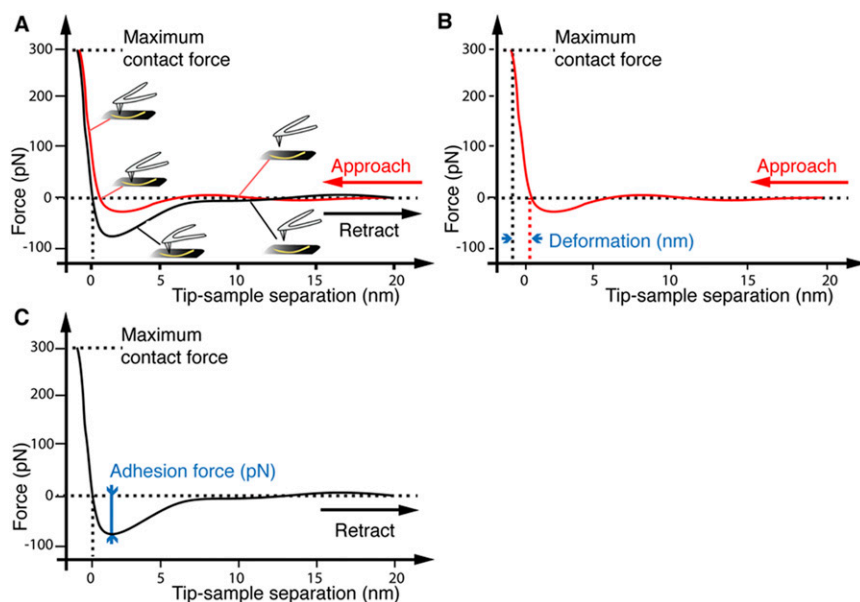

**Fig. S1.** Force-volume mode atomic force microscopy (FV-AFM) extracts nanomechanical properties from force-distance curves. For every pixel of the topography, FV-AFM records force-distance curves. From these force-distance curves, parameters quantifying the sample properties are derived. (A) Approach force-distance curve (red line) records the deflection (force) of the AFM cantilever when approaching the AFM stylus and sample. At a sufficiently small distance, the AFM stylus begins to interact with the sample. Attractive forces pull the AFM stylus toward the sample, and the cantilever deflects downward (negative force). Repulsive forces repelling the AFM stylus and sample deflect the cantilever upward (positive force). The AFM stylus is pressed onto the sample until a preset maximum contact force (imaging force) is reached, which triggers the reversed movement (retraction) of the stylus. During retraction of the AFM cantilever (black line), the cantilever deflection decreases until the contact between the stylus and sample is lost and zero force is detected. (B) Sample deformation describes the indentation of the AFM stylus into the (softer) sample at a maximal contact force. (C) Adhesion force (negative force) between the AFM stylus and sample is obtained from the retraction force-distance curve (1). The exemplified force-distance curve was recorded on the mica support in buffer solution.

1. Medalsy I, Hensen U, Muller DJ (2011) Imaging and quantifying chemical and physical properties of native proteins at molecular resolution by force-volume AFM. *Angew Chem Int Ed Engl* 50(50):12103–12108.



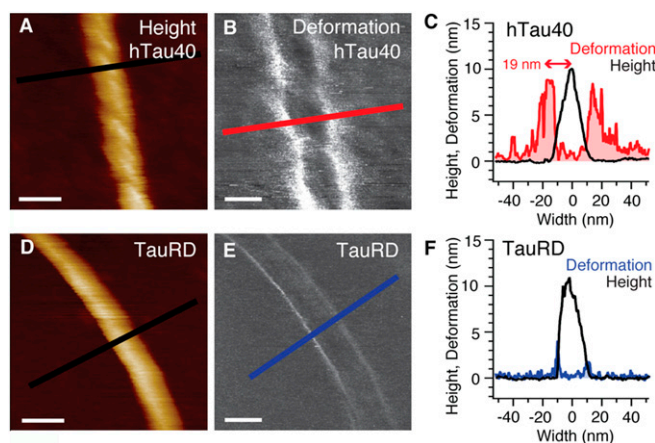

**Fig. 53.** High-resolution force-volume mode atomic force microscopy (FV-AFM) of Tau repeat domain (TauRD) and the longest human Tau protein (hTau40) fibrils recorded at very low imaging forces of 60 pN. Topography (A), a deformation map (B), and superimposed cross-section (C) of height (black line) and deformation (red line) of the hTau40 fibril are shown. Enhanced deformation is detected on both sides of the rigid (low deformation) hTau40 fibril core. This deformation of the fuzzy coat extends to a distance of 19 nm from the fibril core. Topography (D), a deformation map (E), and superimposed cross-section (F) of height (black line) and deformation (red line) of the TauRD fibril are shown. Minor deformation at the edges of the rigid fibril core indicates the absence of the fuzzy coat in the TauRD fibril. High-resolution FV-AFM images were recorded in PBS, applying an imaging force of 60 pN. (Scale bars: A, B, D, and E; 25 nm.)

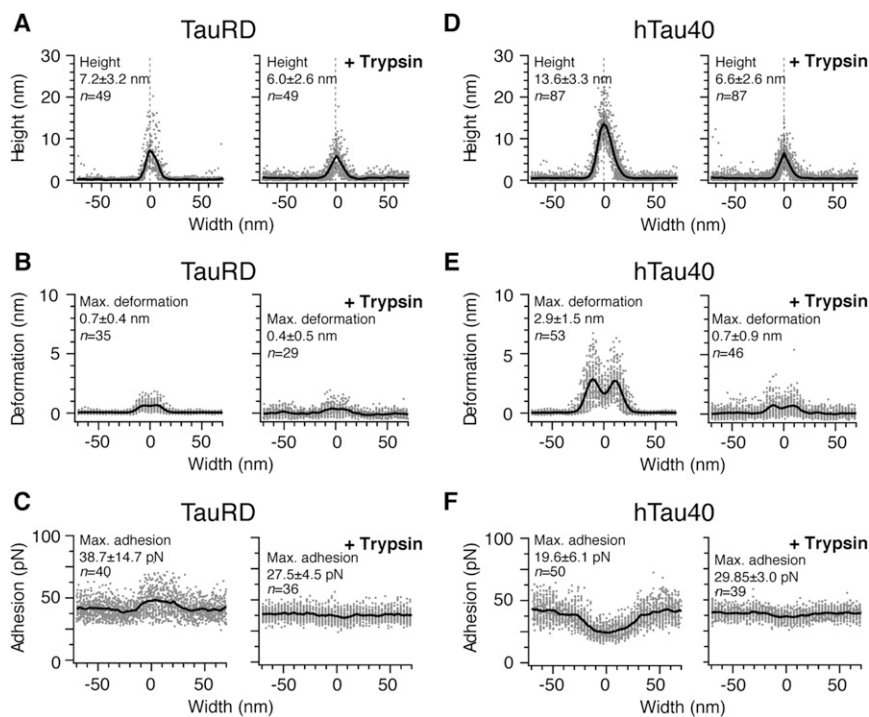

**Fig. 54.** Height, deformation, and adhesion profiles of Tau repeat domain (TauRD) and the longest human Tau protein (hTau40) fibrils. Scatter plots of height (A), deformation (B), and adhesion (C) cross-section profiles measured from TauRD fibrils before (Left) and after (Right) trypsin digestion are shown. Profiles were aligned on the topographic fibril center (dashed lines). Scatter plots of height (D), deformation (E), and adhesion (F) cross-section profiles measured from hTau40 fibrils before and after trypsin digestion are shown. Average profiles (mean ± SD) are displayed as black lines, with error bars giving the SD. Mean values of the maximum (Max.) (mean ± SD) are given for each plot. The number of profiles superimposed and averaged is given by *n*, and values are given as mean ± SD. Force-volume mode atomic force microscopy (FV-AFM) images analyzed for this figure were recorded in 10 mM Tris (pH 7.4) and 50 mM KCl, applying imaging forces of 300 pN.

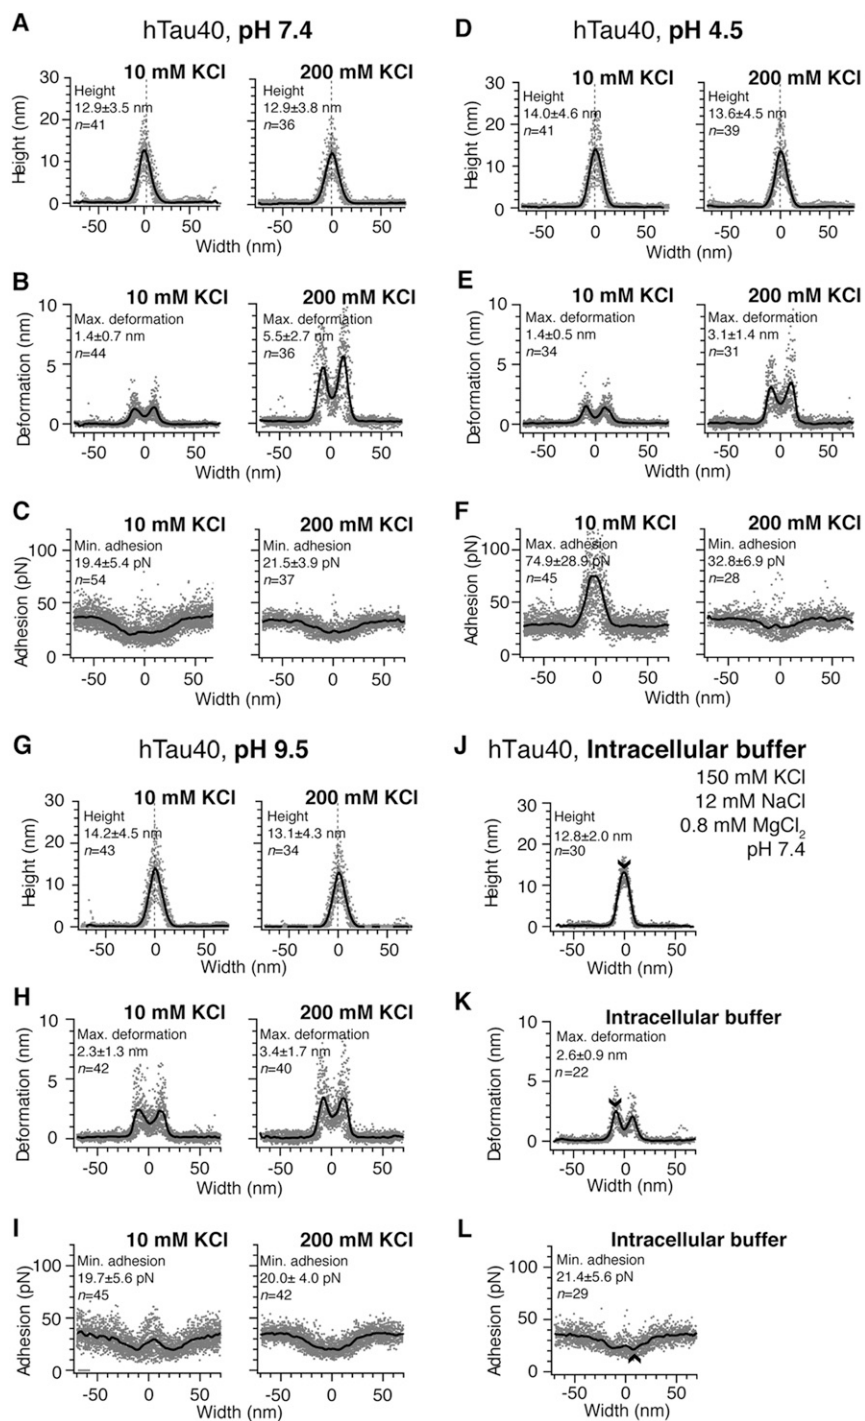

**Fig. S5.** Cross-section profiles of the longest human Tau protein (hTau40) fibrils reveal salt- and pH-dependent properties of the fuzzy coat. Scatter plots of height (A), deformation (B), and adhesion (C) cross-section profiles measured from hTau40 fibrils at pH 7.4 (10 mM Tris) in 10 mM KCl (Left) and 200 mM KCl (Right) are shown. Scatter plots of height (D), deformation (E), and adhesion (F) cross-section profiles measured from hTau40 fibrils at pH 4.5 (10 mM sodium acetate) in 10 mM KCl and 200 mM KCl are shown. Scatter plots of height (G), deformation (H), and adhesion (I) cross-section profiles measured from hTau40 fibrils at pH 9.5 (10 mM Tris) in 10 mM KCl and 200 mM KCl are shown. Scatter plots of height (J), deformation (K), and adhesion (L) cross-section profiles of hTau40 fibrils measured in intracellular buffer [150 mM KCl, 12 mM NaCl, 0.8 mM  $Ca_2Cl$  (pH 7.4)] are shown. The number of profiles superimposed and averaged is given by  $n$ . Profiles were aligned on the fibril center (dashed lines). Mean profiles are displayed as black lines. Mean values of the maximum (Max.) (mean  $\pm$  SD) are given for each condition. Force-volume mode atomic force microscopy (FV-AFM) data analyzed for this figure were recorded applying imaging forces of 300 pN.
